# Supplementary material
Source: PubMed Central journal article supplement (PMC3549054)
Supplement: NIHMS407995-supplement-1_si_001.pdf [file NIHMS407995-supplement-1_si_001.pdf]

## Supplementary Data for

### THE HEME BINDING PROPERTIES OF GLYCERALDEHYDE-3-PHOSPHATE DEHYDROGENASE

*Luciana Hannibal, Daniel Collins, Julie Brassard, Pierre Dorlet, Jérôme Santolini, John H.*

*Dawson and Dennis J. Stuehr\**

From the Department of Pathobiology, Lerner Research Institute, Cleveland Clinic, Cleveland, Ohio 44195, Department of Chemistry and Biochemistry, University of South Carolina, Columbia, South Carolina 29208, Laboratoire stress oxydant et detoxication (LSOD), UMR 8221 CNRS-CEA-Univ Paris-Sud, Saclay, France and Agriculture et Agroalimentaire Canada, Quebec, Canada.

Address correspondence to: Dennis J. Stuehr, Department of Pathobiology (NC-22), Lerner Research Institute, The Cleveland Clinic Foundation, 9500 Euclid Ave., Cleveland, Ohio 44195.  
Phone: 216-445-6950; Fax: 216-636-0104; E-mail: [stuehrd@ccf.org](mailto:stuehrd@ccf.org).

**Fig. S1.** Gel filtration of the rGAPDH-heme complex. Panel A: Chromatogram of the GAPDH-heme complex. Fractions were collected between 8 and 65 min and analyzed by UV-vis spectroscopy. Panel B: UV-visible analysis of the fractions. The ratio  $A_{280}/A_{415}$  of the complex prior to injection was 3.5. The ratio  $A_{280}/A_{415}$  of the eluted fractions containing the highest concentration of heme ranged from 5 to 8.

**Fig. S2.** In-gel heme staining of apo- and heme-bound GAPDH using the o-dianisidine/ $H_2O_2$  peroxidase assay. Panel A shows the heme-staining bands corresponding to rGAPDH-heme (5:1) and apo-GAPDH (negative control). Panel B shows different doses of GAPDH-heme, and iNOSoxy as a positive control for specific heme staining.

**Fig. S3.** Far-UV CD spectra of apo- and heme-bound GAPDH. Addition of heme to apo-GAPDH produced mild changes in the far-UV CD spectrum, suggesting that heme binding is accompanied by modest conformational changes.

**Fig. S4.** Spectrophotometric titrations of rabbit GAPDH with increasing doses of hemin. Panel A. Titration of 10  $\mu$ M GAPDH with hemin (0-10  $\mu$ M). Panel B: UV-visible spectra of free hemin in buffer.

**Fig. S5.** Transfer of ferrous heme from GAPDH to apomyoglobin at 25 °C. Heme transfer to apomyoglobin is accompanied by a decrease in absorption at 425 nm (GAPDH-heme) and a concomitant increase at 434 nm (reduced myoglobin). The inset shows the initial and final spectra.

**Fig. S6.** Reaction of native, anaerobic GAPDH with ferrous heme (Panels A and B), and reaction of GAPDH pre-treated with dithionite and ferrous heme (Panel C). The reaction of GAPDH with ferrous heme (5:1) was slow ( $k_{\text{obs}} = 0.0091 \text{ s}^{-1}$  at 10 °C) and incomplete; only 19% of the total available ferrous heme formed a complex with GAPDH after 10 min. No measurable spectral changes were detected for the reaction between dithionite-treated GAPDH and ferrous heme.

**Fig. S7.** Kinetics of CO binding to two major subpopulations of heme-bound to rGAPDH (2:1, GAPDH:heme, 10 °C). Formation of a Fe(II)-CO complex with a Soret absorption maximum at 410 nm occurs ~4-fold faster than the formation of the 6-coordinate Fe(II)-CO-GAPDH with a characteristic band at 420 nm. The nature of the species absorbing at 410 nm is currently unknown.

**Fig. S8.** UV-visible spectra of purified human GAPDH (Panel A) or *S. suis* (Panel B) GAPDHs from cultures grown in the presence or absence of the heme synthesis precursor  $\delta$ -amino levulinic acid.

**Fig. S9.** Amino acid sequence alignment of *H. sapiens* (Accession P04406.3), *O. cuniculus* (Accession P46406.3) and *S. suis* (Accession AAN86058.1) GAPDHs. The alignment was generated with ClustalW 2.1 software (<http://www.ebi.ac.uk/Tools/msa/clustalw2/>)

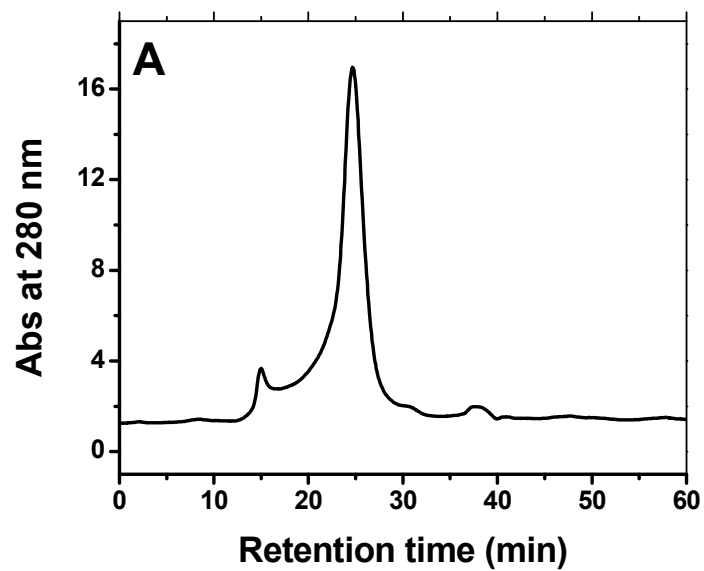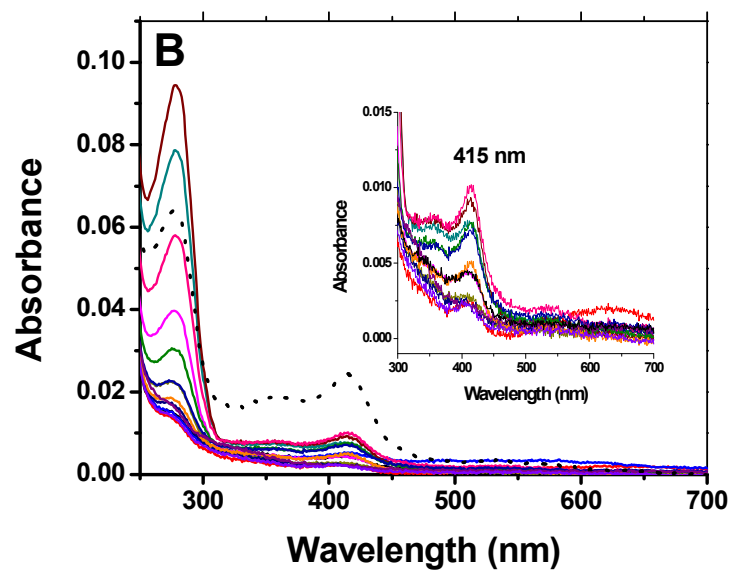

Figure S1

**A**

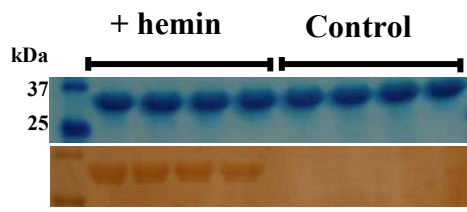

**B**

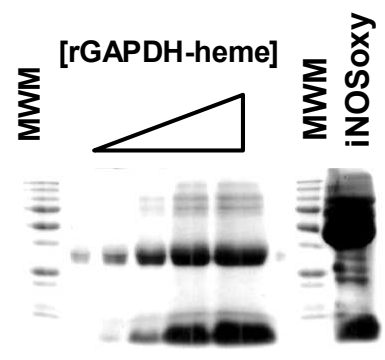

Figure S2

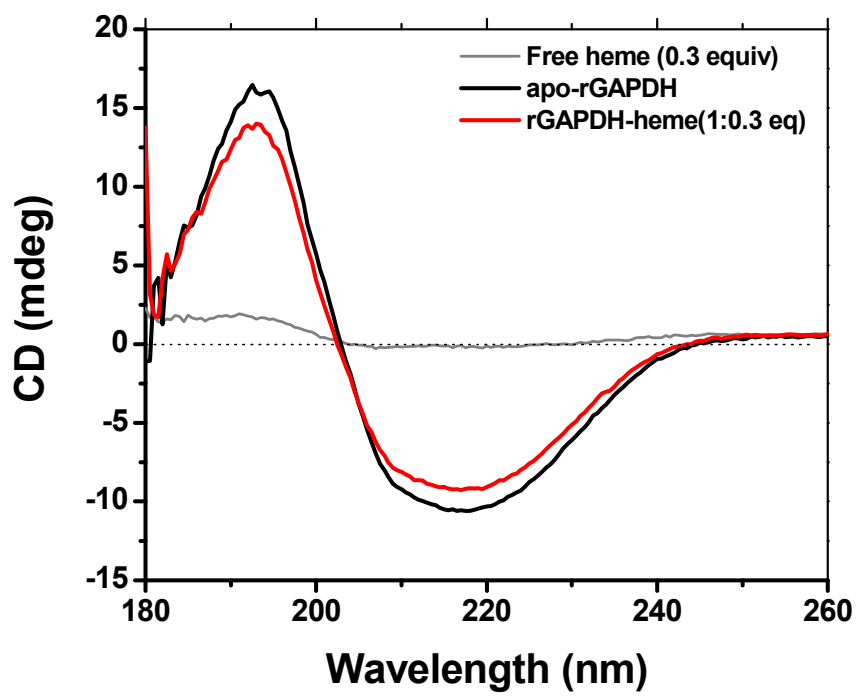

Figure S3

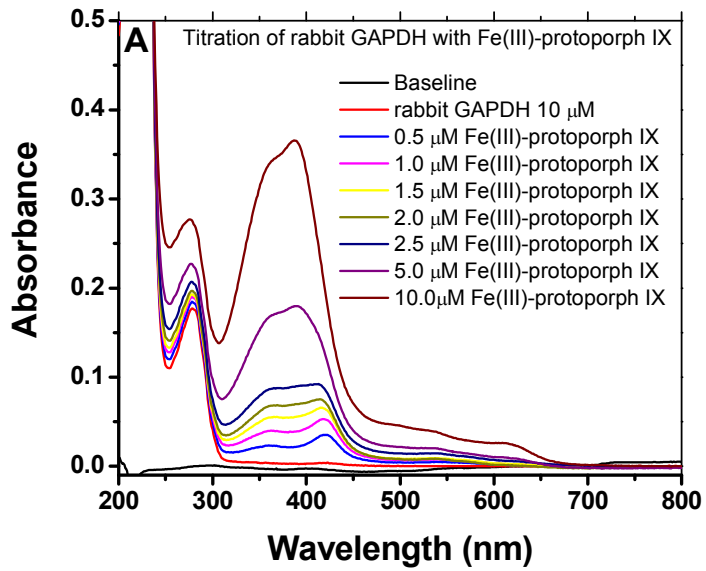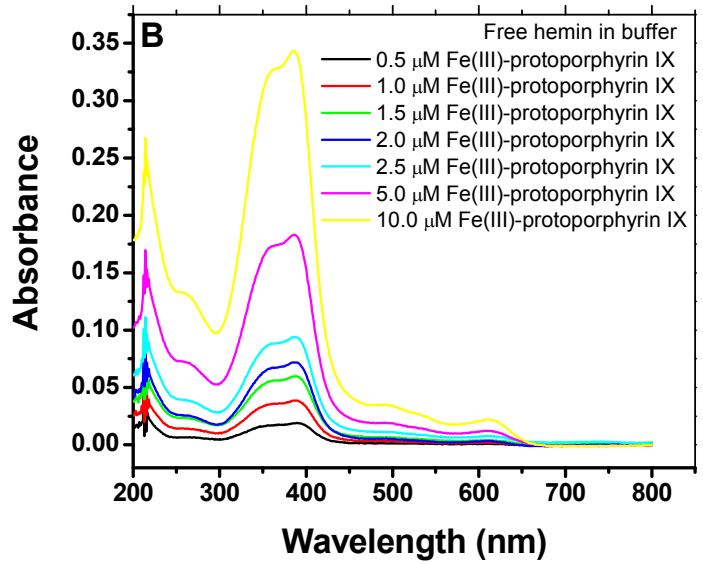

Figure S4

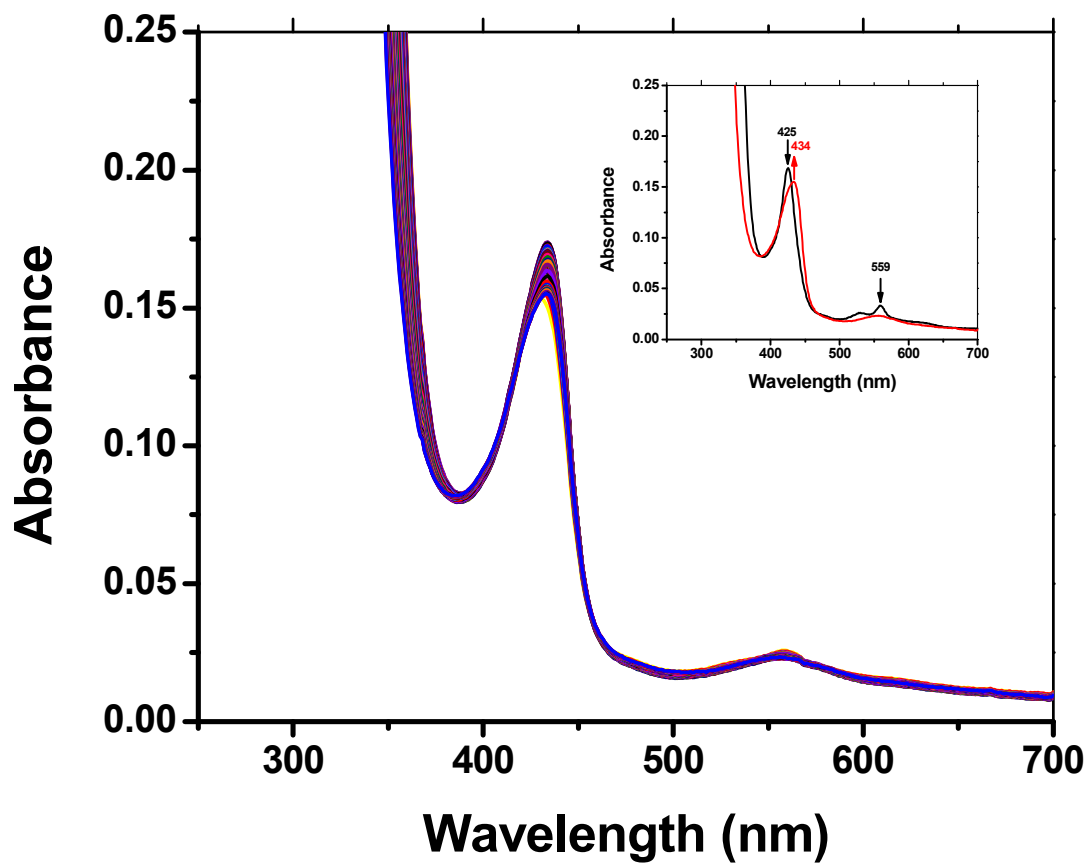

Figure S5

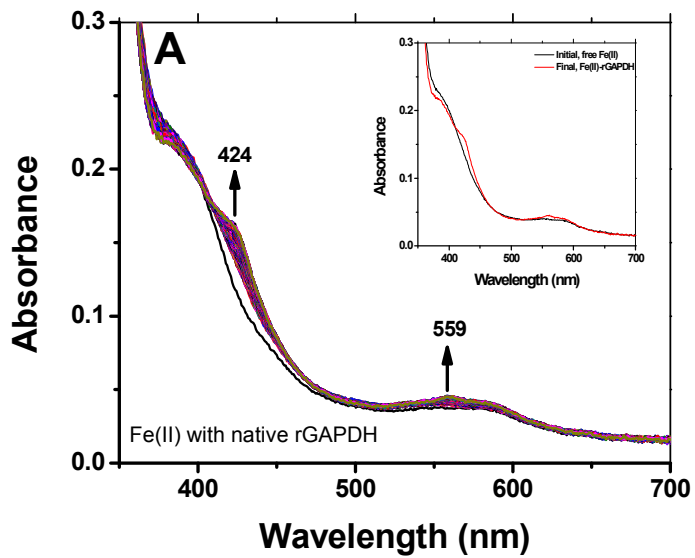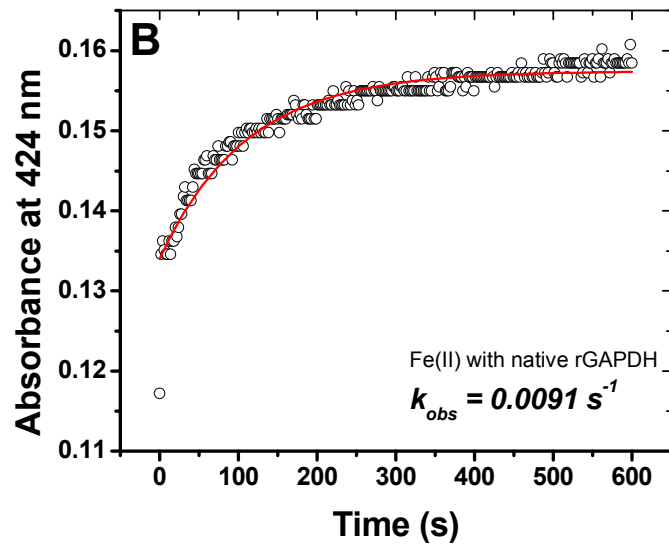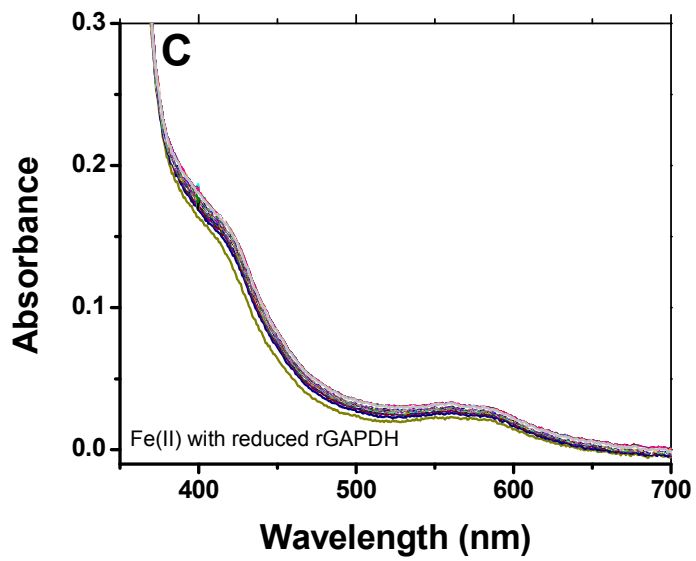

Figure S6



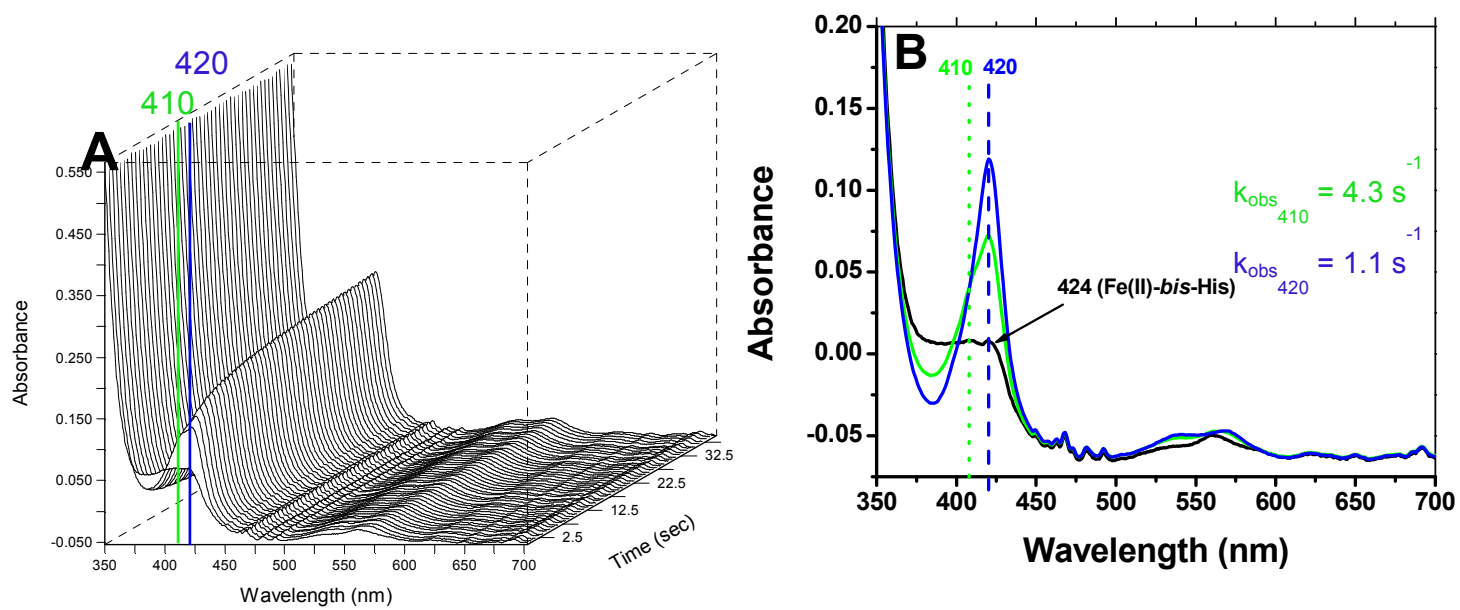

Figure S7

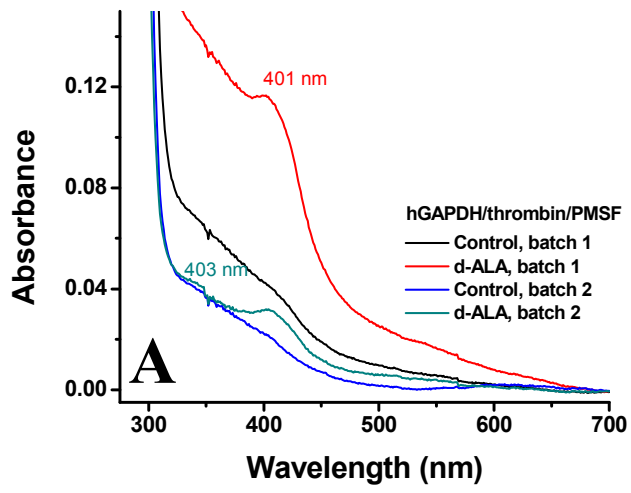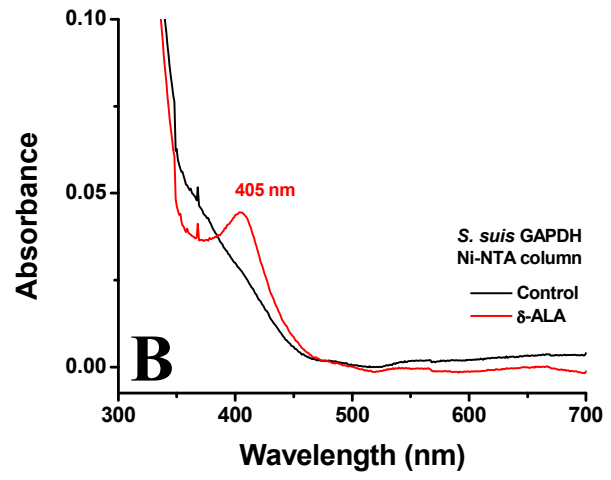

Figure S8

CLUSTAL 2.1 multiple sequence alignment for *H. sapiens*, *O. cuniculus* and *S. suis* GAPDHs (in this order).

```

MGKVKVGVNGFGRIGRLVTRAAFNSGKVDI  GNPIITIFQERDPSKIKWGDAGAEYVVESTGVFTTMEKAGAHLQG-GAKRV 49
MVKVGVNGFGRIGRLVTRAAFNSGKVDVVA  --AITIFQERDPANIKWGDAGAEYVVESTGVFTTMEKAGAHLKG-GAKRV 47
MVVKVGINGFGRIGRLAFRRIQNVEGVEVT  --FVKVSAEREPGNIDWATDGVDIVLEATGFFASKEKAEQHIHANGAKKV 48
                                     :::  **:*:*:*:*  *::  **:*:*:*:*  ***  *:::  ***.*
                                     *::  **:*:*:*:*  *::  **:*:*:*:*  ***  *:::  ***.*

MGKVKVGVNGFGRIGRLVTRAAFNSGKVDI  IISAP-SADAPMFVMGVNHEKYDNSLKII SNASCTTNCLAPLAKVIHDNF 98
MVKVGVNGFGRIGRLVTRAAFNSGKVDVVA  IISAP-SADAPMFVMGVNHEKYDNSLKIVSNASCTTNCLAPLAKVIHDF 96
MVVKVGINGFGRIGRLAFRRIQNVEGVEVT  VITAPGGNDVKTVVFNTNHDIIDGTETVISGASCTTNCLAPMAKALHDAF 98
*:**  .  *  .  *:::*:*  *::  .::*  *****:*:*:*  *  *

MGKVKVGVNGFGRIGRLVTRAAFNSGKVDI  GIVEGLMTTVHAITATQKTVDGPS-GKLWRDGRGALQNIIPASTGAAKAV 147
MVKVGVNGFGRIGRLVTRAAFNSGKVDVVA  GIVEGLMTTVHAITATQKTVDGPS-GKLWRDGRGAAQNIIPASTGAAKAV 145
MVVKVGINGFGRIGRLAFRRIQNVEGVEVT  GVQKGLMTTIHGYTGDQMVLDGPHRGDLRRARAAAANIVPNSTGAAKAI 148
*  :  *****:*  .  *  *  .:***  *  *  .*.  **:*  *****:

MGKVKVGVNGFGRIGRLVTRAAFNSGKVDI  GKVIPELNGKLTGMAFRVPTANVSVVDLTCRLEKPAKYDDIKKVVKQASE 197
MVKVGVNGFGRIGRLVTRAAFNSGKVDVVA  GKVIPELNGKLTGMAFRVPTPNVSVVDLTCRLEKAAKYDDIKKVVKQASE 195
MVVKVGINGFGRIGRLAFRRIQNVEGVEVT  GLVIPELNGKLDGAAQRPVPTGSVTELVATLDKKVTAEENVNAAMKAAAT 198
*  *****  *  *  ***...  **:*  .  *:*  ..  ::::  .:*  *:

MGKVKVGVNGFGRIGRLVTRAAFNSGKVDI  GPLKGI LGYTEHQVSSDFNSDTHSSTFDAGAG--IALN-DHFVKLISWY 244
MVKVGVNGFGRIGRLVTRAAFNSGKVDVVA  GPLKGI LGYTEQVVSDFNSATHSSTFDAGAG--IALN-DHFVKLISWY 242
MVVKVGINGFGRIGRLAFRRIQNVEGVEVT  ----ESFGYTEQVLSSDIVGISFGSLFDATQTKVIEVDGEQLVKVVSWY 244
      :****.*:**:*  .  .::*  ***  *  ::  :::::**:*

MGKVKVGVNGFGRIGRLVTRAAFNSGKVDI  DNEFGYSNRVVDLMAHMASKE- 265
MVKVGVNGFGRIGRLVTRAAFNSGKVDVVA  DNEFGYSNRVVDLMVHMASKE- 263
MVVKVGINGFGRIGRLAFRRIQNVEGVEVT  DNEMSYTAQLVRTLEYFAKIAK 266
***:*  .  *  :  :  *  :  :  *  .

```

Figure S9
